# Supplementary material for: The Evolution of Cell-to-Cell Communication in a Sporulating Bacterium
Source: PubMed Central journal article supplement (PMC3527279; doi:10.1371/journal.pcbi.1002818), 2012-12-20
Supplement: pcbi.1002818.s010.pdf [file pcbi.1002818.s010.pdf]

**Table S1: The number of cells that are present at the end of colony growth for each phenotype, given the initial colony composition.**

| Initial frequency (%) |         |         | Number of cells at the end of colony growth |             |             |             |  |  |  |
|-----------------------|---------|---------|---------------------------------------------|-------------|-------------|-------------|--|--|--|
| Pheno 1               | Pheno 2 | Pheno 3 | Phenotype 1                                 | Phenotype 2 | Phenotype 3 | Total       |  |  |  |
| 0                     | 0       | 100     | 0 ± 0                                       | 0 ± 0       | 197.2 ± 3.2 | 197.2 ± 3.2 |  |  |  |
| 0                     | 25      | 75      | 0 ± 0                                       | 66.2 ± 0.7  | 207.4 ± 4.6 | 273.6 ± 4.2 |  |  |  |
| 0                     | 50      | 50      | 0 ± 0                                       | 139.6 ± 3.5 | 143.1 ± 2.3 | 282.7 ± 2.9 |  |  |  |
| 0                     | 75      | 25      | 0 ± 0                                       | 208.8 ± 1.7 | 71.3 ± 1.4  | 280.2 ± 2.0 |  |  |  |
| 0                     | 100     | 0       | 0 ± 0                                       | 273.6 ± 0.8 | 0 ± 0       | 273.6 ± 0.8 |  |  |  |
| 25                    | 0       | 75      | 65.6 ± 2.0                                  | 0 ± 0       | 201.9 ± 0.8 | 267.6 ± 1.6 |  |  |  |
| 25                    | 25      | 50      | 72.5 ± 0.9                                  | 69.5 ± 0.7  | 143.3 ± 3.3 | 285.3 ± 1.9 |  |  |  |
| 25                    | 50      | 25      | 71.3 ± 0.9                                  | 139.0 ± 2.8 | 70.7 ± 1.5  | 281.1 ± 1.2 |  |  |  |
| 25                    | 75      | 0       | 72.0 ± 1.9                                  | 205.7 ± 2.5 | 0 ± 0       | 277.7 ± 0.7 |  |  |  |
| 50                    | 0       | 50      | 142.8 ± 2.2                                 | 0 ± 0       | 143.3 ± 2.4 | 286.1 ± 1.2 |  |  |  |
| 50                    | 25      | 25      | 143.9 ± 3.1                                 | 69.0 ± 2.3  | 70.3 ± 1.0  | 283.3 ± 2.5 |  |  |  |
| 50                    | 50      | 0       | 143.4 ± 1.7                                 | 134.2 ± 2.9 | 0 ± 0       | 277.6 ± 1.9 |  |  |  |
| 75                    | 0       | 25      | 203.2 ± 2.7                                 | 0 ± 0       | 65.2 ± 1.8  | 268.4 ± 1.4 |  |  |  |
| 75                    | 25      | 0       | 207.8 ± 2.7                                 | 68.1 ± 1.3  | 0 ± 0       | 275.9 ± 2.7 |  |  |  |
| 100                   | 0       | 0       | 251.2 ± 1.5                                 | 0 ± 0       | 0 ± 0       | 251.2 ± 1.5 |  |  |  |
