# Supplementary material for: The Evolution of Cell-to-Cell Communication in a Sporulating Bacterium
Source: PLoS Comput Biol. 2012 Dec 20;8(12):e1002818. doi: 10.1371/journal.pcbi.1002818 (PMC3527279; doi:10.1371/journal.pcbi.1002818)
Supplement: Text S1 — Supplementary material. (PDF) [file pcbi.1002818.s011.pdf]

## Text S1

The chance of having cell division is the same for all cell types, excluding spores (the cell state of sporulation at which  $t = \tau$ ). Spores cannot divide. The chance of having cell division ( $P_{CD}$ ) is given by the following equation (in accordance to Monod saturation kinetics):

$$P_{CD} = \frac{P_{max} \cdot X}{X + K_X} \quad (S1)$$

$X$  is the nutrient concentration that is present in the environment, which changes over time.  $P_{max}$  is the maximal chance of having cell division, which is the chance of having cell division when there is a saturation in the nutrient concentration ( $X \rightarrow \infty$ ).  $K_X$  determines how fast—meaning for which increase in the nutrient concentration—the chance of having cell division is saturated. When  $X = K_X$ , the chance of having cell division equals  $\frac{1}{2} \cdot P_{max}$ . In contrast to the chance of having cell division, the chance of having cell death is independent of the nutrient concentration and fixed for both cells ( $\delta_{Cell}$ ) and spores ( $\delta_{Spore}$ ). A cell should turn into a spore when the growth rate of a cell exceeds that of a spore. The effective growth rate is the chance of having cell division minus the chance of having cell death. Therefore one could derive the critical nutrient concentration ( $X^*$ ) at which a cell should turn into a spore:

$$X^* = \frac{(\delta_{cell} - \delta_{spore}) \cdot K_X}{P_{max} - (\delta_{cell} - \delta_{spore})} \quad (S2)$$

When signal production is assumed to be costly, the chance that a signal-producing cell divides is given by:

$$P_{CD, \text{ Signal production}} = \frac{P_{max} \cdot X}{X + K_X} - f_{Signal} \quad (S3)$$
